# Supplementary material for: Diversity and geographic distribution of dog tick species in Sri Lanka and the life cycle of brown dog tick, Rhipicephalus sanguineus under laboratory conditions
Source: Research Square preprint supplement (doi:10.21203/rs.3.rs-721544/v2), 2022-02-15
Supplement: Supplementary file 1 [file 504f9894c8b8197d57790c35.docx]

**T**able 3 Distribution of tick species collected from dogs in different districts in Sri Lanka (n=3,026)

| Tick Species | Number of ticks recorded in each district | | | | | | | | | | | | | | | | | | | | | | | | | |
| --- | --- | --- | --- | --- | --- | --- | --- | --- | --- | --- | --- | --- | --- | --- | --- | --- | --- | --- | --- | --- | --- | --- | --- | --- | --- | --- |
| Hambantota | Ampara | Trincomalee | Kilinochchi | Anuradhapura | Vavuniya | Puttlam | Batticaloa | Jaffna | | Monargala | Polonnruwa | Mannar | Mullathiv | Nuwareliya | Ratnapura | Colombo | Kandy | Kegalle | Matara | Galle | Gampaha | Kalutara | Kurunegala | Badulla | Matale | |
| *Rh.sanguineus* | 92 | 5 | 143 | 31 | 52 | 35 | 20 | 62 | 305 | | 25 | - | - | 15 | 20 | 46 | 165 | 211 | 115 | 125 | 154 | 85 | 115 | 60 | 5 | 32 | |
| *Rh. haemaphysaloides* | 40 | 32 | 12 | 7 | 37 | 20 | 32 | 25 | 25 | | 55 | 52 | 14 | 5 | 50 | 31 | 10 | 20 | 40 | 9 | - | 12 | 20 | 56 | 38 | 25 | |
| *H. turturis* | - | - | 6 | 8 | - | - | - | - | - | | - | - | - | - | - | - | - | - | 12 | - | - | - | - | - | - | - | |
| *H*. *intermedia* | 25 | 10 | 16 | 1 | 51 | - | 6 | 12 | 2 | | 5 | 35 | 4 | 6 | 42 | 22 | 4 | 6 | 10 | 20 | 11 | 20 | 8 | 27 | 23 | 12 | |
| *H. bispinosa* | 1 | 2 | - | - | 4 | - | - | - | - | | - | 2 | - | - | - | - | - | - | - | 7 | 1 | - | - | - | - | - | |
| *A*. *integrum* | - | - | - | - | - | - | - | - | - | | - | - | - | - | - | 5 | - | 2 | - | 1 | - | - | - | - | 5 |  | |
| *Hyalommasp* | - | - | - | - | - | 2 | - | - | - | | - | - | - | - | - | - | - | - | - | - | - | - | - | - | - | - | |
| *D. auratus* | - | - | - | - | - | - | - | - | | - | - | - | - | - | - | - | - | 5 | - | - | - | - | - | - | - | - | |

Abbreviations: *Rh*, *Rhipicephalus; H, Haemaphysalis; A, Amblyomma; D, Demacentor*
